# Supplementary material for: Lung Cancer Signature Biomarkers: tissue specific semantic similarity based clustering of Digital Differential Display (DDD) data
Source: PubMed Central journal article supplement (PMC3532198; doi:10.1186/1756-0500-5-617), 2012-11-02
Supplement: 1756-0500-5-617-S3.pdf [file 1756-0500-5-617-S3.pdf]

Table 1. Number of Unigene identifiers in DDD1 and DDD2

|                                                                     | DDD1 | DDD2 |
|---------------------------------------------------------------------|------|------|
| Number of Unigene Identifiers                                       | 519  | 203  |
| Number of Unigenes after Fold Change $\geq 2$ cutoff                | 502  | 202  |
| *Number of Unigenes after removing gene duplication (fc $\geq 2$ ). | 472  | 182  |

\*Same gene Symbol but different Unigene Identifier

| List       | #   |              |
|------------|-----|--------------|
| 1          | 472 |              |
| 2          | 182 |              |
| 3          | 220 |              |
| 1 only     | 373 | <b>a</b>     |
| 2 only     | 88  | <b>b</b>     |
| 3 only     | 161 | <b>c</b>     |
| 1 & 2      | 76  | <b>d + g</b> |
| 2 & 3      | 36  | <b>e + g</b> |
| 1 & 3      | 41  | <b>f + g</b> |
| 1 & 2 & 3  | 18  | <b>g</b>     |
| 1 & 2 only | 58  | <b>d</b>     |
| 2 & 3 only | 18  | <b>e</b>     |
| 1 & 3 only | 23  | <b>f</b>     |

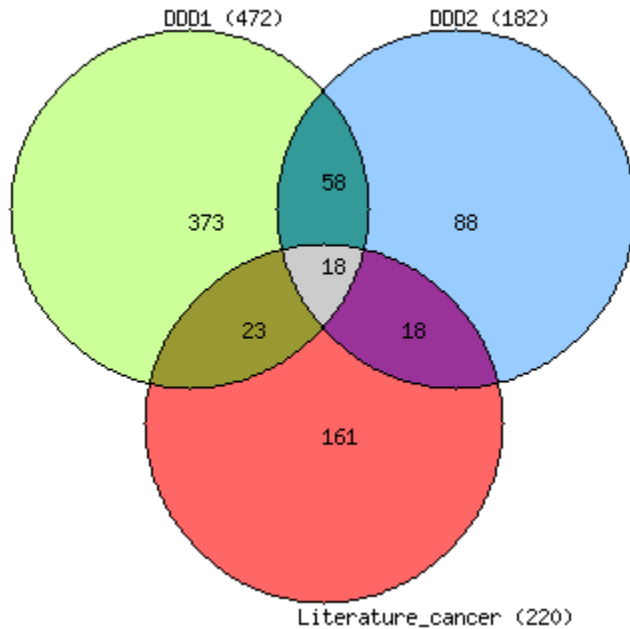

Figure. Three- way Venn diagram to compare DDD1, DDD2 and genes expressing in all types of cancers.

Table2. The complete list of genes and their symbols in different intersections (A to G) of venn diagram.

| A(373)   | B(88)    | C(161)  | D(58)        | E(18)   | F(23)  | G(18)   |
|----------|----------|---------|--------------|---------|--------|---------|
| ABCA13   | ACPP     | AARS    | ADH1B        | ANXA2   | A2M    | ACTG1   |
| ABCD3    | ADAMTS8  | ACLY    | ALDOA        | CFL1    | APOE   | ALDH1A1 |
| ABP1     | AP2A1    | ACTA2   | API5         | CTSD    | CANX   | EEF1A1  |
| ACO1     | ARHGAP1  | ACTB    | APLP2        | EEF1G   | CAV1   | FTH1    |
| ACRBP    | ATP6V0C  | ACTG2   | AZIN1        | HLA-A   | CD55   | GNB2L1  |
| ACSL1    | ATP6V0E1 | ADAR    | C10orf10     | HSPA8   | CLIC4  | PPIA    |
| ACTA1    | BAT3     | AHCY    | CFH          | LGALS1  | CRYAB  | RPL10   |
| ADAM12   | BCAR1    | ANXA11  | COL1A1       | MAP1B   | GPX3   | RPL13A  |
| ADH7     | C1RL     | AP1M1   | COL1A2       | MYL6    | HBA2   | RPL3    |
| ADIPOQ   | CAPNS1   | APOD    | COPB1        | MYL9    | HYOU1  | RPL7A   |
| AFP      | CD63     | APP     | CP           | RPL4    | KRT7   | RPL8    |
| AGER     | CD81     | ARPC1B  | CRISP3       | RPL5    | KRT8   | RPLP0   |
| AGT      | CD99     | ASS     | CSNK1A1      | RPL6    | LDHB   | RPS2    |
| AIDA     | CDKN1A   | ATP5A   | CTNNA1       | RPL7    | PTGDS  | RPS20   |
| AKAP2    | CHPF     | ATP5B   | CYBRD1       | RPS10   | RPL10A | RPS3    |
| ALB      | CKAP4    | B3GALT4 | DMBT1        | SPARCL1 | RPL31  | RPS3A   |
| ALCAM    | CLIC1    | BAL     | EHF          | TIMP1   | RPL37  | RPS4X   |
| ALDH18A1 | COL6A2   | BASP1   | FN1          | VIM     | RPS23  | UBB     |
| ALDH1A3  | COPE     | BCL2L1  | FOS          |         | RPS27  |         |
| ALDOC    | CSDE1    | BHLHB3  | FOSB         |         | RPS6   |         |
| APLP1    | CYB561   | BRI3    | FTL          |         | RPS8   |         |
| APOL1    | DAZ1     | BSG     | GAPDH        |         | STMN1  |         |
| APOL3    | DDX5     | C       | HIF1A        |         | THY1   |         |
| AQP1     | EIF3B    | C1      | HSPA1A       |         |        |         |
| AQP3     | EIF3K    | CALM1   | IGKC         |         |        |         |
| ARPP21   | EIF4G2   | CCDC5   | IGL@         |         |        |         |
| ATCAY    | FAM129B  | CCT3    | KIAA1324     |         |        |         |
| ATF3     | FCGRT    | CCT7    | KLK3         |         |        |         |
| ATP12A   | FLOT1    | CD14    | LDLR         |         |        |         |
| ATP1A3   | GABARAP  | CD46    | LOC100287276 |         |        |         |
| ATP5A1   | GAS5     | CD59    | LOC100288550 |         |        |         |
| ATP6V0A1 | GAS6     | CDKN1C  | LOC100293559 |         |        |         |
| ATP6V0E2 | GDF15    | CLSTN1  | LTF          |         |        |         |
| B3GNT5   | GPX1     | CLTC    | MUC7         |         |        |         |
| B4GALT1  | HLA-DRB1 | CNAP1   | NAMPT        |         |        |         |
| BDKRB2   | IER3     | COL3A1  | NCOA4        |         |        |         |
| BHMT     | IFITM3   | CORO1A  | NET1         |         |        |         |
| BIRC2    | IGFBP4   | COX5B   | NT5C2        |         |        |         |
| BPIL1    | IGFBP5   | COX7C   | PKD4         |         |        |         |
| C10orf81 | IRAK1    | CRAB    | PRKAR1A      |         |        |         |
| C12orf74 | ITGB5    | CTDSP2  | PROM1        |         |        |         |
| C13orf30 | KIAA1191 | CYB5    | PRR4         |         |        |         |
| C1orf116 | KRT4     | CYBB    | RPL9         |         |        |         |

|         |              |           |          |  |  |  |
|---------|--------------|-----------|----------|--|--|--|
| C1orf88 | KRT5         | CYCS      | RPSA     |  |  |  |
| C6orf58 | LGALS3BP     | DDIT4     | SCFV     |  |  |  |
| CA1     | LOC100289173 | DDX1      | SFTPA1   |  |  |  |
| CA3     | LRP10        | DDX24     | SLC2A3   |  |  |  |
| CALCRL  | LRRC41       | DGCR2     | TFPI2    |  |  |  |
| CALM2   | MAGED1       | DNMT1     | TGM2     |  |  |  |
| CALR    | MAT2A        | DTX1      | TICAM2   |  |  |  |
| CAMKK2  | MMP2         | DUSP1     | TMSB10   |  |  |  |
| CAMKV   | MRPL41       | EEF2      | TMSB4X   |  |  |  |
| CAPN2   | NCRNA00188   | EIF2S3    | TNFRSF1A |  |  |  |
| CCDC17  | NCSTN        | EIF3S6    | TPI1     |  |  |  |
| CD200R1 | NDUFB8       | EIF3S8    | TUBA1A   |  |  |  |
| CD302   | NNMT         | EIF4A1    | TUBA1B   |  |  |  |
| CD4     | PKM2         | ENO1      | TXNRD1   |  |  |  |
| CD44    | PLAT         | EPB41L2   | UCHL1    |  |  |  |
| CD83    | PLAU         | FADS1     |          |  |  |  |
| CDH1    | POFUT2       | FNBP1     |          |  |  |  |
| CDHR3   | PRDX1        | FPGS      |          |  |  |  |
| CEACAM5 | PRPF6        | FXYD6     |          |  |  |  |
| CGA     | PSAP         | G6PD      |          |  |  |  |
| CKB     | PSMD2        | GAPD      |          |  |  |  |
| CKM     | PVR          | GGA2      |          |  |  |  |
| CKMT1B  | QSOX1        | GLUL      |          |  |  |  |
| CLCA2   | RBMX         | GNB2      |          |  |  |  |
| CLDN1   | RPL14        | GRF2      |          |  |  |  |
| CLDN12  | RPL23        | GRLF1     |          |  |  |  |
| CLDND1  | RPL23A       | HLA-C     |          |  |  |  |
| CLU     | RPS11        | HLA-DPA1  |          |  |  |  |
| CNP     | RPSAP58      | HLA-E     |          |  |  |  |
| COCH    | SCARF2       | HMGA1     |          |  |  |  |
| CORO7   | SERINC1      | HMG2      |          |  |  |  |
| CPA1    | SF3B2        | HNRPA1    |          |  |  |  |
| CPB1    | SFTPC        | HSPB1     |          |  |  |  |
| CPD     | SNRPC        | HSPCB     |          |  |  |  |
| CPLX2   | SQSTM1       | HSPD1     |          |  |  |  |
| CRYAA   | SRPR         | IMPDH2    |          |  |  |  |
| CRYBB2  | SYVN1        | ITGB4     |          |  |  |  |
| CSF3    | TAGLN        | JUN       |          |  |  |  |
| CSH1    | TCF21        | K-ALPHA-1 |          |  |  |  |
| CSH2    | TGFBI        | KPNB3     |          |  |  |  |
| CSRP1   | TMEM115      | KRT18     |          |  |  |  |
| CTNNB1  | TPM2         | KRT19     |          |  |  |  |
| CYFIP2  | TPP1         | LAMR1     |          |  |  |  |
| CYP11A1 | UBA1         | LDHA      |          |  |  |  |
| CYP17A1 | VASN         | LMNA      |          |  |  |  |
| CYP19A1 |              | M6PRBP1   |          |  |  |  |
| CYP1B1  |              | MKI67     |          |  |  |  |
| CYP21A2 |              | MSH6      |          |  |  |  |

|          |  |          |  |  |  |  |
|----------|--|----------|--|--|--|--|
| CYP2B7P1 |  | MYH11    |  |  |  |  |
| CYP4B1   |  | NDRG2    |  |  |  |  |
| CYP4X1   |  | NDUFA4   |  |  |  |  |
| D4S234E  |  | NDUFA5   |  |  |  |  |
| DDR1     |  | NONO     |  |  |  |  |
| DDX3X    |  | NPM1     |  |  |  |  |
| DDX3Y    |  | NSEP1    |  |  |  |  |
| DES      |  | NUD      |  |  |  |  |
| DLC1     |  | OK/SW-   |  |  |  |  |
| DLG5     |  | cl.56    |  |  |  |  |
| DLK1     |  | P2       |  |  |  |  |
| DNAH12   |  | P40      |  |  |  |  |
| DNTTIP2  |  | PABP     |  |  |  |  |
| DUOX1    |  | PEA15    |  |  |  |  |
| DUSP6    |  | PGK1     |  |  |  |  |
| DYDC2    |  | PHGDH    |  |  |  |  |
| ECT2L    |  | PIK3CD   |  |  |  |  |
| EFCAB1   |  | PKM      |  |  |  |  |
| EHD1     |  | PORIMIN  |  |  |  |  |
| EHD2     |  | PPP1R16B |  |  |  |  |
| EIF5A    |  | PRKWNK1  |  |  |  |  |
| ELF1     |  | PSMB6    |  |  |  |  |
| ELF3     |  | RAB31    |  |  |  |  |
| ELN      |  | RAD23B   |  |  |  |  |
| ENG      |  | RAN      |  |  |  |  |
| ENO2     |  | RBM3     |  |  |  |  |
| ENO3     |  | RERE     |  |  |  |  |
| EPAS1    |  | RPL21    |  |  |  |  |
| ERAP1    |  | RPL27A   |  |  |  |  |
| ERAP2    |  | RPL38    |  |  |  |  |
| ERMN     |  | RPL41    |  |  |  |  |
| ERN2     |  | RPS19    |  |  |  |  |
| EXPH5    |  | RPS24    |  |  |  |  |
| F11R     |  | RPS5     |  |  |  |  |
| F13A1    |  | SBF1     |  |  |  |  |
| F3       |  | SC5DL    |  |  |  |  |
| FAM107A  |  | SCD      |  |  |  |  |
| FAM154B  |  | SDHD     |  |  |  |  |
| FAM46C   |  | SEPP1    |  |  |  |  |
| FBXL3    |  | SERPINA3 |  |  |  |  |
| FCN3     |  | SERPINF1 |  |  |  |  |
| FIGF     |  | SIAT1    |  |  |  |  |
| FLNA     |  | SLC25A3  |  |  |  |  |
| FMO2     |  | SLC25A6  |  |  |  |  |
| FMO5     |  | SLC2A1   |  |  |  |  |
| FRMD4B   |  | SLC3     |  |  |  |  |
| FSTL1    |  | SLC40A1  |  |  |  |  |
| FZD6     |  | SLC7A5   |  |  |  |  |

|          |  |         |  |  |  |  |
|----------|--|---------|--|--|--|--|
| GABBR1   |  | SMARCA4 |  |  |  |  |
| GABRP    |  | SORL1   |  |  |  |  |
| GALC     |  | SPRED2  |  |  |  |  |
| GALNT3   |  | SPTBN1  |  |  |  |  |
| GALNT4   |  | SRP9    |  |  |  |  |
| GANAB    |  | SRRM2   |  |  |  |  |
| GCLC     |  | SYK     |  |  |  |  |
| GDI1     |  | TACSTD2 |  |  |  |  |
| GFAP     |  | TBC1D1  |  |  |  |  |
| GH1      |  | TIMP3   |  |  |  |  |
| GNAS     |  | TKT     |  |  |  |  |
| GNE      |  | TLN1    |  |  |  |  |
| GNS      |  | TRAP1   |  |  |  |  |
| GP2      |  | TU3A    |  |  |  |  |
| GPD1L    |  | TUBA3   |  |  |  |  |
| GPI      |  | TUBA6   |  |  |  |  |
| GPM6A    |  | TUBB2   |  |  |  |  |
| GPM6B    |  | UBE2    |  |  |  |  |
| GPR110   |  | UBE2J1  |  |  |  |  |
| GPRC5A   |  | UBE2R2  |  |  |  |  |
| GPX8     |  | USP22   |  |  |  |  |
| GRM3     |  | VAMP2   |  |  |  |  |
| H2AFZ    |  | ZNF151  |  |  |  |  |
| HADHB    |  |         |  |  |  |  |
| HBB      |  |         |  |  |  |  |
| HBG2     |  |         |  |  |  |  |
| HHAT     |  |         |  |  |  |  |
| HIST1H4C |  |         |  |  |  |  |
| HMP19    |  |         |  |  |  |  |
| HSPA2    |  |         |  |  |  |  |
| HSPA6    |  |         |  |  |  |  |
| ICAM1    |  |         |  |  |  |  |
| IGHG1    |  |         |  |  |  |  |
| IGHV1-18 |  |         |  |  |  |  |
| IGJ      |  |         |  |  |  |  |
| IRAK3    |  |         |  |  |  |  |
| IRF6     |  |         |  |  |  |  |
| ITGA5    |  |         |  |  |  |  |
| KIF1A    |  |         |  |  |  |  |
| KLK2     |  |         |  |  |  |  |
| KPNA2    |  |         |  |  |  |  |
| KRT1     |  |         |  |  |  |  |
| KRT12    |  |         |  |  |  |  |
| KRT13    |  |         |  |  |  |  |
| LAMB2    |  |         |  |  |  |  |
| LARS     |  |         |  |  |  |  |
| LDB3     |  |         |  |  |  |  |
| LDLRAD1  |  |         |  |  |  |  |

|                                                                                                                                                                                                                                                                                                                                                                                                                             |  |  |  |  |  |  |
|-----------------------------------------------------------------------------------------------------------------------------------------------------------------------------------------------------------------------------------------------------------------------------------------------------------------------------------------------------------------------------------------------------------------------------|--|--|--|--|--|--|
| LIPF<br>LOC100287415<br>LOXL2<br>LOXL4<br>LPO<br>LRIG3<br>LRRIQ1<br>LYZ<br>MAEL<br>MAFF<br>MAG<br>MAGT1<br>MALAT1<br>MAPRE2<br>MATN1<br>MB<br>MBP<br>MCFD2<br>MET<br>MLC1<br>MLLT11<br>MOBP<br>MOV10<br>MPZL2<br>MS4A8B<br>MTF1<br>MYL2<br>MYO1C<br>NAA50<br>NAPSA<br>NCAM1<br>NDRG1<br>NDRG4<br>NEFL<br>NEFM<br>NKX2-1<br>NR4A1<br>NSF<br>NT5E<br>NUP62<br>OXR1<br>PAM<br>PAQR6<br>PDE4D<br>PEBP1<br>PEX13<br>PGA3<br>PGA4 |  |  |  |  |  |  |
|-----------------------------------------------------------------------------------------------------------------------------------------------------------------------------------------------------------------------------------------------------------------------------------------------------------------------------------------------------------------------------------------------------------------------------|--|--|--|--|--|--|

|         |  |  |  |  |  |  |
|---------|--|--|--|--|--|--|
| PHF7    |  |  |  |  |  |  |
| PIGR    |  |  |  |  |  |  |
| PITRM1  |  |  |  |  |  |  |
| PLEKHB1 |  |  |  |  |  |  |
| PLP1    |  |  |  |  |  |  |
| PLS1    |  |  |  |  |  |  |
| PNLIP   |  |  |  |  |  |  |
| PODXL   |  |  |  |  |  |  |
| POF1B   |  |  |  |  |  |  |
| POMC    |  |  |  |  |  |  |
| PRDX2   |  |  |  |  |  |  |
| PRKAA1  |  |  |  |  |  |  |
| PRKCZ   |  |  |  |  |  |  |
| PRL     |  |  |  |  |  |  |
| PRM2    |  |  |  |  |  |  |
| PRNP    |  |  |  |  |  |  |
| PRSS1   |  |  |  |  |  |  |
| PRSS23  |  |  |  |  |  |  |
| PSG1    |  |  |  |  |  |  |
| PSG3    |  |  |  |  |  |  |
| PSG4    |  |  |  |  |  |  |
| PTMA    |  |  |  |  |  |  |
| PTRF    |  |  |  |  |  |  |
| PUM1    |  |  |  |  |  |  |
| QDPR    |  |  |  |  |  |  |
| RAB10   |  |  |  |  |  |  |
| RBM47   |  |  |  |  |  |  |
| REG1A   |  |  |  |  |  |  |
| REG1B   |  |  |  |  |  |  |
| RGS1    |  |  |  |  |  |  |
| RHO     |  |  |  |  |  |  |
| RHOA    |  |  |  |  |  |  |
| RHPN2   |  |  |  |  |  |  |
| RND3    |  |  |  |  |  |  |
| RPH3A   |  |  |  |  |  |  |
| RPL13   |  |  |  |  |  |  |
| RPL18   |  |  |  |  |  |  |
| RPL18A  |  |  |  |  |  |  |
| RPL28   |  |  |  |  |  |  |
| RPL30   |  |  |  |  |  |  |
| RPL35   |  |  |  |  |  |  |
| RPL36   |  |  |  |  |  |  |
| RPL37A  |  |  |  |  |  |  |
| RPLP1   |  |  |  |  |  |  |
| RPLP2   |  |  |  |  |  |  |
| RPS15   |  |  |  |  |  |  |
| RPS17   |  |  |  |  |  |  |
| RPS18   |  |  |  |  |  |  |

|          |  |  |  |  |  |  |
|----------|--|--|--|--|--|--|
| RPS29    |  |  |  |  |  |  |
| RPS9     |  |  |  |  |  |  |
| RSAD2    |  |  |  |  |  |  |
| RTN1     |  |  |  |  |  |  |
| RTN3     |  |  |  |  |  |  |
| SAMD12   |  |  |  |  |  |  |
| SARNP    |  |  |  |  |  |  |
| SCARA5   |  |  |  |  |  |  |
| SCNN1A   |  |  |  |  |  |  |
| SEC31A   |  |  |  |  |  |  |
| SEC61A1  |  |  |  |  |  |  |
| SELL     |  |  |  |  |  |  |
| SEMG2    |  |  |  |  |  |  |
| SERF2    |  |  |  |  |  |  |
| SERP1    |  |  |  |  |  |  |
| SERPINA5 |  |  |  |  |  |  |
| SERPINB3 |  |  |  |  |  |  |
| SERPINB4 |  |  |  |  |  |  |
| SERPINH1 |  |  |  |  |  |  |
| SFTA3    |  |  |  |  |  |  |
| SFTPB    |  |  |  |  |  |  |
| SFTPD    |  |  |  |  |  |  |
| SH2D4A   |  |  |  |  |  |  |
| SH3BGRL2 |  |  |  |  |  |  |
| SH3GLB2  |  |  |  |  |  |  |
| SLC15A2  |  |  |  |  |  |  |
| SLC1A2   |  |  |  |  |  |  |
| SLC1A3   |  |  |  |  |  |  |
| SLC33A1  |  |  |  |  |  |  |
| SLC34A2  |  |  |  |  |  |  |
| SLC44A4  |  |  |  |  |  |  |
| SLC5A1   |  |  |  |  |  |  |
| SLC5A8   |  |  |  |  |  |  |
| SLC6A14  |  |  |  |  |  |  |
| SLC6A4   |  |  |  |  |  |  |
| SLFN13   |  |  |  |  |  |  |
| SLITRK6  |  |  |  |  |  |  |
| SLK      |  |  |  |  |  |  |
| SNAP25   |  |  |  |  |  |  |
| SND1     |  |  |  |  |  |  |
| SOD2     |  |  |  |  |  |  |
| SPAG17   |  |  |  |  |  |  |
| SPARC    |  |  |  |  |  |  |
| SPOCK1   |  |  |  |  |  |  |
| SPP1     |  |  |  |  |  |  |
| STAR     |  |  |  |  |  |  |
| STMN2    |  |  |  |  |  |  |
| STOML3   |  |  |  |  |  |  |



|                                                                                                                                                                                                                                                                                                                                                                                   |  |  |  |  |  |  |
|-----------------------------------------------------------------------------------------------------------------------------------------------------------------------------------------------------------------------------------------------------------------------------------------------------------------------------------------------------------------------------------|--|--|--|--|--|--|
| STXBP1<br>SUSD2<br>SV2A<br>SYT4<br>TBL1XR1<br>TC2N<br>TCF4<br>TCP11<br>TEKT1<br>TF<br>TG<br>THBS1<br>THBS3<br>TMC5<br>TMEM100<br>TNFAIP3<br>TNFRSF19<br>TNNC2<br>TNNI1<br>TPT1<br>TRIM26<br>TSPAN19<br>TSPAN5<br>TSPAN7<br>TTN<br>TUBB2B<br>TUBB4<br>UMOD<br>UNC45A<br>UTRN<br>VCP<br>VNN3<br>VTCN1<br>VWA5A<br>WARS<br>WBP2<br>WDR49<br>WDR78<br>WWP2<br>XAF1<br>YSK4<br>ZFP36L1 |  |  |  |  |  |  |
|-----------------------------------------------------------------------------------------------------------------------------------------------------------------------------------------------------------------------------------------------------------------------------------------------------------------------------------------------------------------------------------|--|--|--|--|--|--|
